# Supplementary material for: High performance screening, structural and molecular dynamics analysis to identify H1 inhibitors from TCM Database@Taiwan
Source: Royal Society of Chemistry journal article supplement (doi:10.1039/c1mb05320e), 2011-10-19
Supplement: c1mb05320e.pdf [file c1mb05320e.pdf]

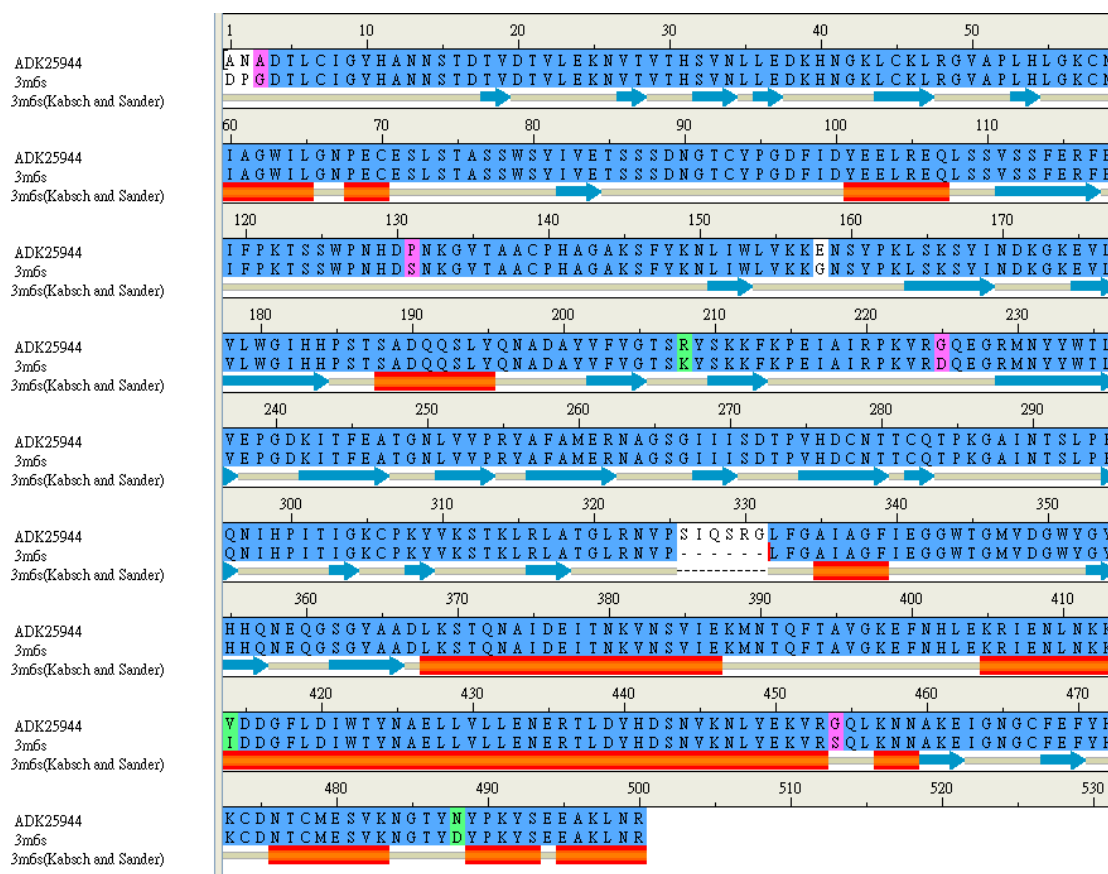

**Figure S1.** Sequence alignment between new H1 (ADK25944) and template H1 sequence (3M6S). The identity and similarity were 96.8 % and 97.4 % respectively.

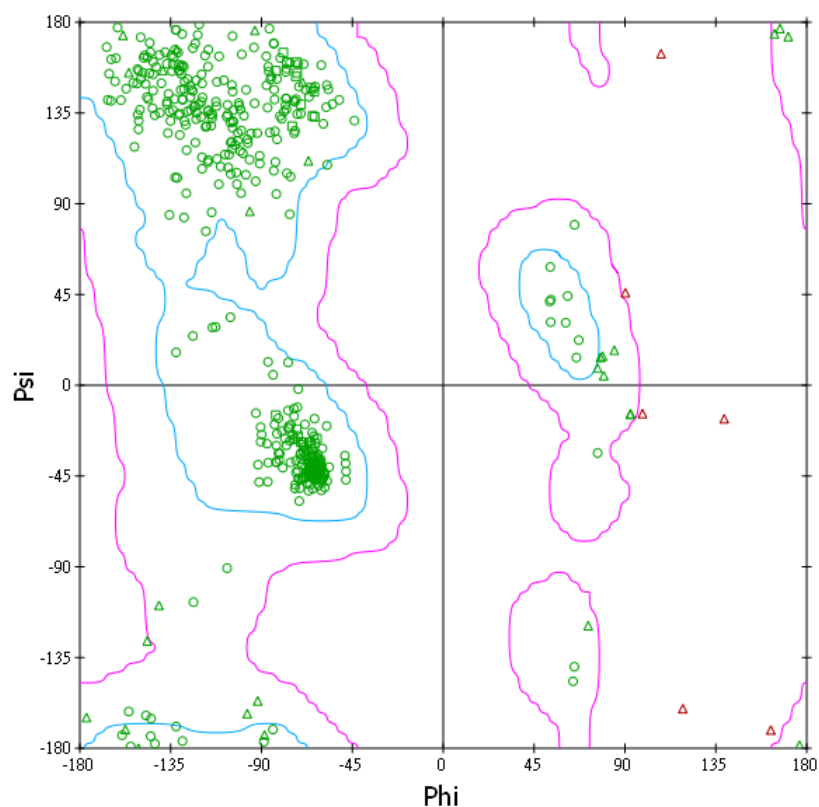

**Figure S2.** The Ramachandran plot of modeled H1 structure constructed through homology modeling. The generated plot indicates that 94.2 % of the residues were located in the favored region (cyan area), 4.6 % of residues were located in semi-favored region (magenta area), and 1.2 % of residues were located in disallowed region.

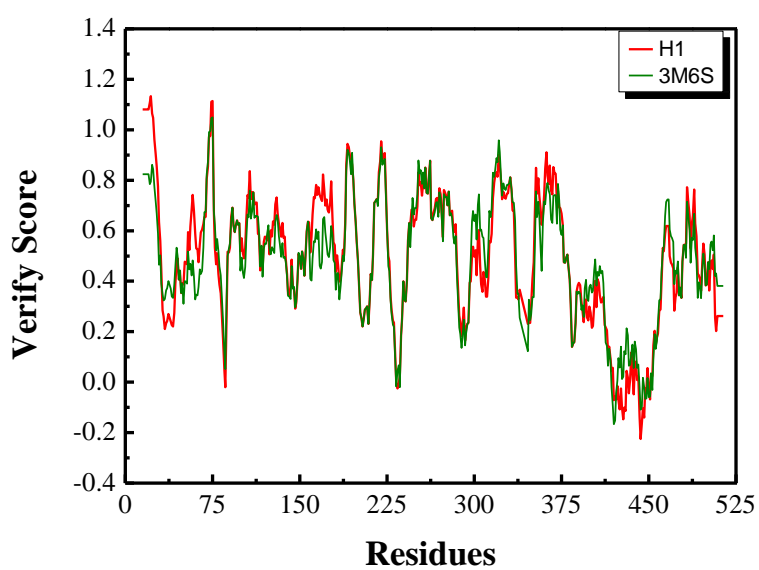

**Figure S3.** The profile-3D results of modeled and template H1 structures (3M6S). The binding site residues Lys71, Asp103, Asn104, and Arg238 have positive scores, indicating reasonable conformation.
